# Supplementary material
Source: MDPI journal article supplement (https://www.mdpi.com/2071-1050/14/14/8539)
Supplement: s1 [file s1]

**Table S1.** List of competences from the Hogan Competence Model.

| Number | Competency Name          | Definition                                                                                        | Domain        |
|--------|--------------------------|---------------------------------------------------------------------------------------------------|---------------|
| 1      | Anticipating Problems    | Forecasts and detects errors, gaps, and potential flaws.                                          | Business      |
| 2      | Driving Innovation       | Stimulates creative ideas and perspectives that add value.                                        | Business      |
| 3      | Financial Insight        | Applies financial knowledge to achieve organizational goals and objectives.                       | Business      |
| 4      | Industry Insight         | Applies knowledge of industry trends and outlooks to achieve organizational goals and objectives. | Business      |
| 5      | Leveraging Work Skills   | Applies technology and job-relevant abilities to complete work tasks.                             | Business      |
| 6      | Political Savvy          | Recognizes, interprets, and works within the political environment of an organization.            | Business      |
| 7      | Presenting to Others     | Conveys ideas and information to groups.                                                          | Business      |
| 8      | Processing Information   | Gathers, organizes, and analyzes diverse sources of information.                                  | Business      |
| 9      | Quality Focus            | Strives to meet quality standards and produce quality work products.                              | Business      |
| 10     | Safety Focus             | Attends to precautions and proper procedures to guard against workrelated accidents and injuries. | Business      |
| 11     | Sales Focus              | Generates revenue by promoting products and services to others.                                   | Business      |
| 12     | Setting Goals            | Identifies short-term objectives and steps to achieve them.                                       | Business      |
| 13     | Solving Problems         | Identifies solutions given available information.                                                 | Business      |
| 14     | Written Communication    | Expresses ideas and opinions effectively in writing.                                              | Business      |
| 15     | Customer Focus           | Provides courteous, timely, and helpful service to encourage client loyalty.                      | Interpersonal |
| 16     | Engagement               | Demonstrates loyalty and commitment through enthusiasm and extra effort.                          | Interpersonal |
| 17     | Influencing Others       | Persuades others to help achieve organizational goals and objectives.                             | Interpersonal |
| 18     | Leveraging Diversity     | Respects and values individual differences to obtain a desired effect or result.                  | Interpersonal |
| 19     | Leveraging People Skills | Gets along well with others, is tactful, and behaves appropriately in social situations.          | Interpersonal |
| 20     | Listening to Others      | Listens and restates the ideas and opinions of others to improve mutual understanding.            | Interpersonal |
| 21     | Negotiating              | Explores alternatives to reach outcomes acceptable to all parties.                                | Interpersonal |

|    |                               |                                                                                                        |               |
|----|-------------------------------|--------------------------------------------------------------------------------------------------------|---------------|
| 22 | Networking                    | Builds and maintains a system of strategic business connections.                                       | Interpersonal |
| 23 | Organizational<br>Citizenship | Exceeds job requirements to help the organization.                                                     | Interpersonal |
| 24 | Relationship Building         | Develops collaborative relationships to facilitate current and future objectives.                      | Interpersonal |
| 25 | Teamwork                      | Collaborates with others to achieve goals.                                                             | Interpersonal |
| 26 | Verbal Communication          | Expresses ideas and opinions effectively in spoken conversations.                                      | Interpersonal |
| 27 | Accountability                | Accepts responsibility for one's actions regardless of outcomes.                                       | Intrapersonal |
| 28 | Caring about People           | Displays sensitivity towards the attitudes, feelings, or circumstances of others.                      | Intrapersonal |
| 29 | Competing with Others         | Strives to exceed others' performance.                                                                 | Intrapersonal |
| 30 | Dealing with Ambiguity        | Comfortably handles unclear or unpredictable situations.                                               | Intrapersonal |
| 31 | Dependability                 | Performs work in a reliable, consistent, and timely manner.                                            | Intrapersonal |
| 32 | Detail Focus                  | Performs work with care, accuracy, and attention to detail.                                            | Intrapersonal |
| 33 | Displaying Confidence         | Projects poise and self-assurance when completing work tasks.                                          | Intrapersonal |
| 34 | Driving for Results           | Accomplishes goals, completes tasks, and achieves results.                                             | Intrapersonal |
| 35 | Flexibility                   | Changes direction as appropriate based on new ideas, approaches, and strategies.                       | Intrapersonal |
| 36 | Handling Stress               | Manages pressure without getting upset, moody, or anxious.                                             | Intrapersonal |
| 37 | Integrity                     | Acts honestly in accordance with moral or ethical principles.                                          | Intrapersonal |
| 38 | Overcoming Obstacles          | Pursues goals and strategies despite discouragement or opposition.                                     | Intrapersonal |
| 39 | Planning and Organizing       | Coordinates and directs activities to help achieve business objectives.                                | Intrapersonal |
| 40 | Positive Attitude             | Displays a positive disposition towards work.                                                          | Intrapersonal |
| 41 | Professionalism               | Acts in accordance with job-related values, principles, and standards.                                 | Intrapersonal |
| 42 | Rule Compliance               | Adheres to directions, policies, and/or legal guidelines.                                              | Intrapersonal |
| 43 | Self Development              | Actively acquires new knowledge and skills to remain current with and/or grow beyond job requirements. | Intrapersonal |

|    |                     |                                                                                               |               |
|----|---------------------|-----------------------------------------------------------------------------------------------|---------------|
| 44 | Self Management     | Demonstrates appropriate motivation, attitude, and self-control.                              | Intrapersonal |
| 45 | Staying Alert       | Remains focused when performing monotonous tasks.                                             | Intrapersonal |
| 46 | Taking Initiative   | Takes action without needing direction from others.                                           | Intrapersonal |
| 47 | Taking Smart Risks  | Evaluates tradeoffs between potential costs and benefits and acts accordingly.                | Intrapersonal |
| 48 | Time Management     | Plans and prioritizes work to maximize efficiency and minimize downtime.                      | Intrapersonal |
| 49 | Working Hard        | Consistently strives to complete tasks and assignments at work.                               | Intrapersonal |
| 50 | Attracting Talent   | Recruits, rewards, and retains individuals with needed skills and abilities.                  | Leadership    |
| 51 | Business Insight    | Applies business knowledge to achieve organizational goals and objectives.                    | Leadership    |
| 52 | Decision Making     | Uses sound judgment to make timely and effective decisions.                                   | Leadership    |
| 53 | Delegating          | Assigns work to others based on tasks, skills, and workloads.                                 | Leadership    |
| 54 | Developing People   | Provides support, coaching, training, and career direction to others.                         | Leadership    |
| 55 | Driving Change      | Champions new methods, systems, and processes to improve performance.                         | Leadership    |
| 56 | Driving Performance | Provides guidance and feedback to maximize performance of individuals and/or groups.          | Leadership    |
| 57 | Driving Strategy    | Directs effort to achieve long-term business objectives.                                      | Leadership    |
| 58 | Inspiring Others    | Motivates others to accomplish organizational goals.                                          | Leadership    |
| 59 | Leading Others      | Demonstrates general leadership ability and effectiveness.                                    | Leadership    |
| 60 | Managing Conflict   | Resolves hostilities and disagreements between others.                                        | Leadership    |
| 61 | Managing Resources  | Coordinates people and financial and material capital to maximize efficiency and performance. | Leadership    |
| 62 | Team Building       | Assembles productive groups based upon required skills, goals and tasks.                      | Leadership    |

**Table S2.** List of key competences from the KOC-TOP competence model.

| Number | Competence                                                                                                                                  | Definition                                                                                         |
|--------|---------------------------------------------------------------------------------------------------------------------------------------------|----------------------------------------------------------------------------------------------------|
| 1      | Digitalisation 4.0                                                                                                                          | Digitalisation of infrastructure, augmented and virtual reality, IoT, technological literacy, etc. |
| 2      | Automation and robotics                                                                                                                     | Design, implementation and use of robots and work processes for the factories of the future, etc.  |
| 3      | Competences of digitalised lean production                                                                                                  | Lean & digital lean, mastery of lean thinking, digitalisation, etc.                                |
| 4      | Artificial intelligence competences                                                                                                         | Machine learning, knowledge technologies, deep learning, computer vision, robot control, etc.      |
| 5      | Competences in the field of research and development                                                                                        | Monetisation of development projects, innovation culture, rapid prototyping                        |
| 6      | Competences in the field of sensor and measurement systems for the factories of the future                                                  | /                                                                                                  |
| 7      | Competences in the field of sustainable development                                                                                         | Environmental protection, circular economy, social responsibility                                  |
| 8      | Competences in managing processes of technologies, technologies, human resources and organisations in technologically advanced environments | /                                                                                                  |
| 9      | Business competences                                                                                                                        | Accounting, financial, bookkeeping                                                                 |
| 10     | Management and implementation of changes                                                                                                    | Work processes, technologies, intelligent business systems, strategy development                   |
| 11     | Quality assurance competences                                                                                                               | /                                                                                                  |
| 12     | Security competences                                                                                                                        | Technological and cyber security, occupational health, risk management                             |
| 13     | Sales competences                                                                                                                           | Marketing, improving the recognition of own brands, development of after-sales services            |
| 14     | Cognitive competences                                                                                                                       | Problem solving, critical and systems thinking, creativity, lifelong learning                      |

|           |                                       |                                                                                                    |
|-----------|---------------------------------------|----------------------------------------------------------------------------------------------------|
| <b>15</b> | Competences of emotional intelligence | Emotional literacy, psychophysical stability, empathy                                              |
| <b>16</b> | Competences of communication          | Communication with colleagues, clients, public speaking, business presentations, foreign languages |
| <b>17</b> | Cultural literacy                     | Learning about the cultures of foreign business environments                                       |
